# Supplementary material
Source: Research Square preprint supplement (doi:10.21203/rs.3.rs-10388048/v1)
Supplement: Supplementary file 1 [file c74ff8c3a381a0aef2f60a7c.docx]

**Table 1: Summary statistics of STR motif classes analyzed in this study**

| Category | Count | Percentage | Mean O/E ratio | Mean conservation |
| --- | --- | --- | --- | --- |
| Total motifs | 1280 | 100.0% | 0.0158 | NA |
| CG motifs | 291 | 22.73% | 0.0071 | NA |
| Non-CG motifs | 989 | 77.27% | 0.0184 | NA |
| Conserved non-CG motifs | 11 | 0.86% | NA | 0.768 |
| CG in conserved set | 0 | 0.0% | NA | NA |

**Supplementary Table S1: Complete Dataset Summary**

| Category | Subcategory | Count | Percentage | Mean oe ratio | Mean conservation | Notes |
| --- | --- | --- | --- | --- | --- | --- |
| All_Motifs | Total | 1280 | 100.00 | 0.0158 | NA | All 4‑bp and 5‑bp STR motifs analyzed |
| CpG-depleted | CG-containing | 291 | 22.73 | 0.007089 | NA | Extreme depletion |
| CpG-depleted | Non-CG | 989 | 77.27 | 0.018423 | NA | Moderate depletion |
| Conserved non‑CG | Total | 11 | 0.86 | NA | 0.768 | Identified through conservation analysis |
| Conserved non‑CG | CG-containing | 0 | 0.00 | NA | NA | Complete absence of CG motifs |
| Conserved non‑CG | Non-CG | 11 | 100.00 | NA | 0.768 | All are short motifs (2-4 bp) |
| Top_Depleted | CGATA | 1 | 0.08 | 3.8×10⁻⁵ | NA | Most depleted: 26,288-fold reduction |
| Top_Depleted | CGAGT | 1 | 0.08 | 9.4×10⁻⁵ | NA | 10,615-fold reduction |
| Top_Depleted | CGTCA | 1 | 0.08 | 1.42×10⁻⁴ | NA | 7,041-fold reduction |

**Supplementary Table S2: Top 10 Most Depleted Motifs**

| kmer | k | observed | expected | oe ratio | p-value | fold reduction | significance |
| --- | --- | --- | --- | --- | --- | --- | --- |
| CGATA | 5 | 1 | 26287.9 | 3.8×10⁻⁵ | <1×10⁻³⁰⁰ | 26287.9 | Extreme |
| CGAGT | 5 | 2 | 21229.1 | 9.4×10⁻⁵ | <1×10⁻³⁰⁰ | 10614.5 | Extreme |
| CGTCA | 5 | 5 | 35206.4 | 1.4×10⁻⁴ | <1×10⁻³⁰⁰ | 7041.3 | Extreme |
| CGACT | 5 | 4 | 22292.0 | 1.8×10⁻⁴ | <1×10⁻³⁰⁰ | 5573.0 | Extreme |
| CGAAT | 5 | 4 | 21788.7 | 1.8×10⁻⁴ | <1×10⁻³⁰⁰ | 5447.2 | Extreme |
| CGGTA | 5 | 1 | 5320.0 | 1.9×10⁻⁴ | <1×10⁻³⁰⁰ | 5320.0 | Extreme |
| CGGAA | 5 | 7 | 36951.2 | 1.9×10⁻⁴ | <1×10⁻³⁰⁰ | 5278.7 | Extreme |
| ACGCC | 5 | 12 | 62450.2 | 1.9×10⁻⁴ | <1×10⁻³⁰⁰ | 5204.2 | Extreme |
| CGATT | 5 | 5 | 24994.1 | 2.0×10⁻⁴ | <1×10⁻³⁰⁰ | 4998.8 | Extreme |
| TCGAG | 5 | 8 | 39061.8 | 2.1×10⁻⁴ | <1×10⁻³⁰⁰ | 4882.7 | Extreme |

**Supplementary Table S3**

Evolutionary conservation of depleted DNA motifs across primate species

| Motif | k | Observed | Expected | O/E Ratio | P-value | Human | Chimp | Gorilla | Orangutan | Macaque | Avg Cons | Significance |
| --- | --- | --- | --- | --- | --- | --- | --- | --- | --- | --- | --- | --- |
| ACAC | 4 | 2,687 | 116,978.9 | 0.0230 | <1×10⁻³⁰⁰ | 0.971 | 0.900 | 0.787 | 0.713 | 0.521 | 0.778 | Strong |
| AAGA | 4 | 6,556 | 321,665.1 | 0.0204 | <1×10⁻³⁰⁰ | 0.923 | 0.851 | 0.834 | 0.673 | 0.499 | 0.756 | Strong |
| TTTAA | 5 | 2,655 | 29,874.1 | 0.0889 | <1×10⁻³⁰⁰ | 0.953 | 0.862 | 0.768 | 0.651 | 0.528 | 0.753 | Moderate |
| TCTT | 4 | 5,998 | 248,420.7 | 0.0241 | <1×10⁻³⁰⁰ | 0.932 | 0.811 | 0.817 | 0.661 | 0.523 | 0.749 | Strong |
| GAGG | 4 | 2,912 | 217,366.4 | 0.0134 | <1×10⁻³⁰⁰ | 0.930 | 0.845 | 0.794 | 0.643 | 0.517 | 0.746 | Strong |
| TATG | 4 | 2,831 | 85,009.7 | 0.0333 | <1×10⁻³⁰⁰ | 0.920 | 0.886 | 0.776 | 0.667 | 0.476 | 0.745 | Strong |
| ATAG | 4 | 2,132 | 65,749.3 | 0.0324 | <1×10⁻³⁰⁰ | 0.922 | 0.873 | 0.796 | 0.626 | 0.491 | 0.742 | Strong |
| ATCT | 4 | 2,044 | 243,981.5 | 0.0084 | <1×10⁻³⁰⁰ | 0.922 | 0.837 | 0.781 | 0.605 | 0.523 | 0.734 | Very strong |
| TCTA | 4 | 2,709 | 109,578.7 | 0.0247 | <1×10⁻³⁰⁰ | 0.914 | 0.855 | 0.756 | 0.658 | 0.482 | 0.733 | Strong |
| AGAA | 4 | 6,839 | 297,472.6 | 0.0230 | <1×10⁻³⁰⁰ | 0.872 | 0.878 | 0.756 | 0.647 | 0.475 | 0.726 | Strong |
| CTTT | 4 | 5,442 | 319,406.7 | 0.0170 | <1×10⁻³⁰⁰ | 0.882 | 0.909 | 0.766 | 0.606 | 0.458 | 0.724 | Strong |
| TATC | 4 | 1,814 | 60,428.6 | 0.0300 | <1×10⁻³⁰⁰ | 0.929 | 0.858 | 0.742 | 0.619 | 0.463 | 0.722 | Strong |
| AGAT | 4 | 2,141 | 90,695.3 | 0.0236 | <1×10⁻³⁰⁰ | 0.918 | 0.775 | 0.820 | 0.571 | 0.525 | 0.722 | Strong |
| AAATT | 5 | 2,358 | 27,864.0 | 0.0846 | <1×10⁻³⁰⁰ | 0.914 | 0.890 | 0.680 | 0.620 | 0.462 | 0.713 | Moderate |
| TCAT | 4 | 2,853 | 223,929.1 | 0.0127 | <1×10⁻³⁰⁰ | 0.859 | 0.880 | 0.741 | 0.617 | 0.464 | 0.712 | Strong |
| TCCCC | 5 | 612 | 56,320.1 | 0.0109 | <1×10⁻³⁰⁰ | 0.868 | 0.751 | 0.799 | 0.622 | 0.507 | 0.710 | Strong |
| GAAA | 4 | 6,176 | 311,070.9 | 0.0199 | <1×10⁻³⁰⁰ | 0.855 | 0.778 | 0.744 | 0.651 | 0.488 | 0.703 | Strong |
| ACAT | 4 | 3,375 | 146,749.2 | 0.0230 | <1×10⁻³⁰⁰ | 0.873 | 0.786 | 0.738 | 0.630 | 0.487 | 0.703 | Strong |
| TAGA | 4 | 2,226 | 161,701.3 | 0.0138 | <1×10⁻³⁰⁰ | 0.857 | 0.851 | 0.673 | 0.597 | 0.513 | 0.698 | Strong |
| ATAC | 4 | 2,554 | 80,791.2 | 0.0316 | <1×10⁻³⁰⁰ | 0.896 | 0.805 | 0.712 | 0.615 | 0.459 | 0.697 | Strong |
| GATA | 4 | 1,369 | 183,199.2 | 0.0075 | <1×10⁻³⁰⁰ | 0.862 | 0.787 | 0.753 | 0.610 | 0.467 | 0.696 | Very strong |
| CCTTT | 5 | 505 | 61,452.0 | 0.0082 | <1×10⁻³⁰⁰ | 0.853 | 0.836 | 0.743 | 0.586 | 0.460 | 0.695 | Very strong |
| ATGG | 4 | 1,523 | 105,138.2 | 0.0145 | <1×10⁻³⁰⁰ | 0.846 | 0.784 | 0.754 | 0.618 | 0.451 | 0.691 | Strong |
| TTCA | 4 | 3,863 | 167,409.0 | 0.0231 | <1×10⁻³⁰⁰ | 0.860 | 0.797 | 0.736 | 0.570 | 0.484 | 0.689 | Strong |
| TTTC | 4 | 8,686 | 83,102.7 | 0.1045 | <1×10⁻³⁰⁰ | 0.879 | 0.817 | 0.734 | 0.584 | 0.419 | 0.687 | Moderate |
| AACC | 4 | 1,254 | 81,992.1 | 0.0153 | <1×10⁻³⁰⁰ | 0.877 | 0.831 | 0.686 | 0.554 | 0.473 | 0.684 | Strong |
| ATTC | 4 | 2,424 | 64,874.3 | 0.0374 | <1×10⁻³⁰⁰ | 0.836 | 0.787 | 0.714 | 0.614 | 0.467 | 0.684 | Strong |
| TGAA | 4 | 3,103 | 249,701.8 | 0.0124 | <1×10⁻³⁰⁰ | 0.847 | 0.801 | 0.709 | 0.594 | 0.463 | 0.683 | Strong |
| GAAAA | 5 | 2,184 | 129,626.7 | 0.0168 | <1×10⁻³⁰⁰ | 0.834 | 0.793 | 0.733 | 0.600 | 0.445 | 0.681 | Strong |
| AGAC | 4 | 1,468 | 61,296.6 | 0.0239 | <1×10⁻³⁰⁰ | 0.851 | 0.819 | 0.712 | 0.552 | 0.461 | 0.679 | Strong |
| CTAT | 4 | 1,675 | 130,794.3 | 0.0128 | <1×10⁻³⁰⁰ | 0.885 | 0.752 | 0.673 | 0.592 | 0.494 | 0.679 | Strong |
| CCCTT | 5 | 322 | 37,264.3 | 0.0086 | <1×10⁻³⁰⁰ | 0.824 | 0.798 | 0.756 | 0.581 | 0.434 | 0.678 | Very strong |
| AAGG | 4 | 2,423 | 124,438.6 | 0.0195 | <1×10⁻³⁰⁰ | 0.814 | 0.783 | 0.738 | 0.570 | 0.471 | 0.675 | Strong |
| AAAG | 4 | 8,816 | 77,580.0 | 0.1136 | <1×10⁻³⁰⁰ | 0.867 | 0.753 | 0.711 | 0.553 | 0.448 | 0.666 | Moderate |
| TTTG | 4 | 7,689 | 74,148.8 | 0.1037 | <1×10⁻³⁰⁰ | 0.833 | 0.808 | 0.663 | 0.567 | 0.449 | 0.664 | Moderate |
| ATGA | 4 | 2,722 | 202,404.4 | 0.0134 | <1×10⁻³⁰⁰ | 0.801 | 0.831 | 0.696 | 0.550 | 0.440 | 0.663 | Strong |
| AATT | 4 | 6,143 | 180,131.9 | 0.0341 | <1×10⁻³⁰⁰ | 0.821 | 0.794 | 0.680 | 0.572 | 0.443 | 0.662 | Strong |
| TCTG | 4 | 2,283 | 97,417.4 | 0.0234 | <1×10⁻³⁰⁰ | 0.839 | 0.765 | 0.660 | 0.571 | 0.456 | 0.658 | Strong |
| ATCC | 4 | 1,046 | 118,972.1 | 0.0088 | <1×10⁻³⁰⁰ | 0.809 | 0.764 | 0.697 | 0.538 | 0.441 | 0.650 | Very strong |
| ATGT | 4 | 3,124 | 223,539.9 | 0.0140 | <1×10⁻³⁰⁰ | 0.803 | 0.717 | 0.700 | 0.576 | 0.450 | 0.649 | Strong |
| AGAG | 4 | 3,685 | 161,199.5 | 0.0229 | <1×10⁻³⁰⁰ | 0.807 | 0.715 | 0.677 | 0.564 | 0.471 | 0.647 | Strong |
| TTAT | 4 | 8,190 | 240,428.0 | 0.0341 | <1×10⁻³⁰⁰ | 0.794 | 0.755 | 0.675 | 0.564 | 0.424 | 0.642 | Strong |
| GAAG | 4 | 2,591 | 138,435.9 | 0.0187 | <1×10⁻³⁰⁰ | 0.793 | 0.746 | 0.626 | 0.605 | 0.434 | 0.641 | Strong |
| GAGGG | 5 | 596 | 46,096.1 | 0.0129 | <1×10⁻³⁰⁰ | 0.806 | 0.739 | 0.657 | 0.566 | 0.436 | 0.641 | Strong |
| TATT | 4 | 8,465 | 260,569.2 | 0.0325 | <1×10⁻³⁰⁰ | 0.787 | 0.715 | 0.707 | 0.583 | 0.401 | 0.638 | Strong |
| CTCCT | 5 | 703 | 65,435.1 | 0.0107 | <1×10⁻³⁰⁰ | 0.784 | 0.755 | 0.632 | 0.548 | 0.465 | 0.637 | Strong |
| CTCTC | 5 | 968 | 46,988.4 | 0.0206 | <1×10⁻³⁰⁰ | 0.764 | 0.725 | 0.674 | 0.564 | 0.457 | 0.637 | Strong |
| TTAA | 4 | 5,954 | 168,629.8 | 0.0353 | <1×10⁻³⁰⁰ | 0.789 | 0.753 | 0.696 | 0.492 | 0.415 | 0.629 | Strong |
| AACA | 4 | 5,479 | 370,737.9 | 0.0148 | <1×10⁻³⁰⁰ | 0.777 | 0.751 | 0.660 | 0.512 | 0.411 | 0.622 | Strong |
| AGGGA | 5 | 542 | 43,805.7 | 0.0124 | <1×10⁻³⁰⁰ | 0.746 | 0.723 | 0.676 | 0.571 | 0.394 | 0.622 | Strong |

**Supplementary Table S4 | Representative STR motif depletion patterns across the significance continuum.**

| kmer | k | observed | expected | O/E ratio | p-value | fold reduction | significance |
| --- | --- | --- | --- | --- | --- | --- | --- |
| AACA | 4 | 5479 | 370737.93 | 0.0148 | <1×10⁻³⁰⁰ | 67.7 | Strong |
| CCTTC | 5 | 509 | 29075.86 | 0.0175 | <1×10⁻³⁰⁰ | 57.1 | Strong |
| GGTAA | 5 | 130 | 24826.25 | 0.0052 | <1×10⁻³⁰⁰ | 191.0 | Very strong |
| AATTA | 5 | 1472 | 27215.69 | 0.0541 | <1×10⁻³⁰⁰ | 18.5 | Moderate |
| CGGCA | 5 | 14 | 42791.47 | 0.0003 | <1×10⁻³⁰⁰ | 3056.5 | Extreme |
| ACGGC | 5 | 6 | 19260.11 | 0.0003 | <1×10⁻³⁰⁰ | 3210.0 | Extreme |
| GGACG | 5 | 12 | 1118.72 | 0.0107 | <1×10⁻³⁰⁰ | 93.2 | Strong |
| TGGAT | 5 | 321 | 17577.40 | 0.0183 | <1×10⁻³⁰⁰ | 54.8 | Strong |

**Supplementary Table S5**

| Motif | k | Conservation Score | O/E Ratio | Significance |
| --- | --- | --- | --- | --- |
| ACAC | 4 | 0.9705 | 0.02297 | Strong |
| TTTAA | 5 | 0.9533 | 0.08887 | Moderate |
| TCTT | 4 | 0.9322 | 0.02415 | Strong |
| GAGG | 4 | 0.9297 | 0.01340 | Strong |
| TATC | 4 | 0.9294 | 0.03002 | Strong |
| AAGA | 4 | 0.9227 | 0.02038 | Strong |
| ATCT | 4 | 0.9224 | 0.00838 | Very strong |
| ATAG | 4 | 0.9216 | 0.03243 | Strong |
| TATG | 4 | 0.9199 | 0.03330 | Strong |
| AGAT | 4 | 0.9177 | 0.02361 | Strong |
| AAATT | 5 | 0.9139 | 0.08463 | Moderate |

**Supplementary Table S6**

| Cell_Type | Target_N | Target_Mean | Target_SD | Control_N | Control_Mean | Control_SD | Fold_Change | Significant |
| --- | --- | --- | --- | --- | --- | --- | --- | --- |
| Neurons | 10 | 0.150 | 0.337 | 16 | 0.327 | 0.252 | 0.459 | False |
| Keratinocytes | 10 | 0.400 | 0.316 | 16 | 0.341 | 0.259 | 1.174 | False |
| Pancreatic Beta Cells | 10 | 0.950 | 0.158 | 16 | 0.539 | 0.337 | 1.763 | True |
| Hepatocytes | 10 | 0.400 | 0.316 | 16 | 0.302 | 0.110 | 1.325 | False |
| T Cells | 10 | 0.100 | 0.211 | 16 | 0.292 | 0.304 | 0.343 | False |
| Fetal Cardiomyocytes | 10 | 0.550 | 0.284 | 16 | 0.422 | 0.215 | 1.304 | False |

**Supplementary Table S7: Expression Summary in Pancreatic Beta Cells**

| Condition | Target_Mean | Control_Mean | Fold_Change | p_value | Significant | Significance |
| --- | --- | --- | --- | --- | --- | --- |
| Normal | 0.950 | 0.539 | 1.76 | 0.00118 | 0.00354 | ** |
| T1D | 0.266 | 0.239 | 1.11 | 0.8750 | 1.0000 | ns |
| T2D | 0.179 | 0.212 | 0.84 | 0.7850 | 1.0000 | ns |

**Supplementary Table S8: DNA Methylation Summary at Conserved Non-CG Motifs (T1D and T2D)**

| Condition | Motif | Mean_Control | Mean_Disease | Fold_Change | p_value | Significance |
| --- | --- | --- | --- | --- | --- | --- |
| T1D | AAGA | 0.231 | 0.230 | 0.999 | 0.9990 |  |
| T1D | ACAC | 0.110 | 0.108 | 0.984 | 0.9735 |  |
| T1D | ATAG | 0.072 | 0.073 | 1.016 | 0.9814 |  |
| T1D | ATCT | 0.200 | 0.202 | 1.009 | 0.9875 |  |
| T1D | GAGG | 0.209 | 0.205 | 0.981 | 0.9767 |  |
| T1D | TATG | 0.390 | 0.388 | 0.996 | 0.9952 |  |
| T1D | TCTT | 0.169 | 0.173 | 1.023 | 0.9681 |  |
| T2D | AAGA | 0.104 | 0.055 | 0.530 | 0.0034 | ** |
| T2D | GAGG | 0.104 | 0.055 | 0.530 | 0.0034 | ** |
| T2D | TATG | 0.104 | 0.055 | 0.530 | 0.0034 | ** |
| T2D | ATCT | 0.104 | 0.055 | 0.530 | 0.0034 | ** |
